# Supplementary material for: Rescue Potential of Supportive Embryo Culture Conditions on Bovine Embryos Derived from Metabolically Compromised Oocytes
Source: PubMed Central journal article supplement (PMC7663530; doi:10.3390/ijms21218206), 2020-11-02
Supplement: ijms-21-08206-s001.pdf [file ijms-21-08206-s001.pdf]

## Rescue potential of supportive embryo culture conditions on bovine embryos derived from metabolically-compromised oocytes

### Supplementary Materials:

**Table S1.** The effect of ITS or serum supplementation during IVC on developmental competence within the same *in vitro* maturation group (BASAL, PA and HCOMBI):

| Maturation    | Culture | Oocytes used | Cleaved embryos               | Two-cell stage               | Four-cell plus                 | Fragmented embryos          | Day 7 blastocysts             | Day 8 blastocysts            |
|---------------|---------|--------------|-------------------------------|------------------------------|--------------------------------|-----------------------------|-------------------------------|------------------------------|
| <b>Basal</b>  | BSA     | 515          | 395 <sup>ab</sup><br>(76.69%) | 48 <sup>a</sup><br>(9.32%)   | 255 <sup>a</sup><br>(49.51%)   | 63 (12.23%)                 | 105<br>(20.38%)               | 125<br>(24.27%)              |
| Basal         | ITS     | 510          | 406 <sup>a</sup><br>(79.6%)   | 63 <sup>ab</sup><br>(12.35%) | 250 <sup>a</sup><br>(49.01%)   | 56 (10.98%)                 | 124<br>(24.31%)               | 139<br>(27.25%)              |
| Basal         | Serum   | 488          | 348 <sup>b</sup><br>(71.31%)  | 73 <sup>b</sup><br>(14.95%)  | 182 <sup>b</sup><br>(37.29%)   | 55 (11.27%)                 | 119<br>(24.39%)               | 136<br>(27.86%)              |
| <b>PA</b>     | BSA     | 270          | 176<br>(65.18%)               | 42<br>(15.55%)               | 81 <sup>xy§§</sup><br>(30.00%) | 35 (12.96%)                 | 30 <sup>x</sup><br>(11.11%)   | 37 <sup>x</sup><br>(13.70%)  |
| PA            | ITS     | 278          | 200 <sup>§</sup><br>(71.94%)  | 43<br>(15.46%)               | 110 <sup>x§</sup><br>(39.56%)  | 30 (10.79%)                 | 52 <sup>y</sup> (18.7%)       | 68 <sup>y</sup><br>(24.46%)  |
| PA            | Serum   | 247          | 156 <sup>§</sup><br>(63.15%)  | 54<br>(21.86%)               | 53 <sup>xy§</sup><br>(21.45%)  | 30 (12.14%)                 | 30 <sup>xy</sup><br>(12.14%)  | 45 <sup>xy</sup><br>(18.21%) |
| <b>HCOMBI</b> | BSA     | 527          | 377<br>(71.53%)               | 63<br>(11.95%)               | 221<br>(41.93%)                | 65 (12.33%)                 | 87 <sup>j</sup><br>(16.50%)   | 96 <sup>§</sup><br>(18.21%)  |
| HCOMBI        | ITS     | 525          | 387<br>(73.71%)               | 46<br>(8.76%)                | 235<br>(44.76%)                | 84 <sup>§</sup><br>(16.00%) | 101 <sup>jk</sup><br>(19.23%) | 120<br>(22.85%)              |
| HCOMBI        | Serum   | 377          | 275<br>(72.94%)               | 55<br>(14.58%)               | 149<br>(39.52%)                | 41 <sup>§</sup><br>(10.87%) | 88 <sup>k</sup><br>(23.34%)   | 91 <sup>§</sup><br>(24.13%)  |

% values refer to proportions from total number of used oocytes. Values with different superscripts within the same *in vitro* maturation group are significantly different at P<0.05. Values labeled with a, b are used within BASAL IVM; x, y is used for maturation in the presence of PA; j, k is used within HCOMBI IVM. Values labeled with “§” or “§” tend to be different from each other at P<0.1 and >0.05.

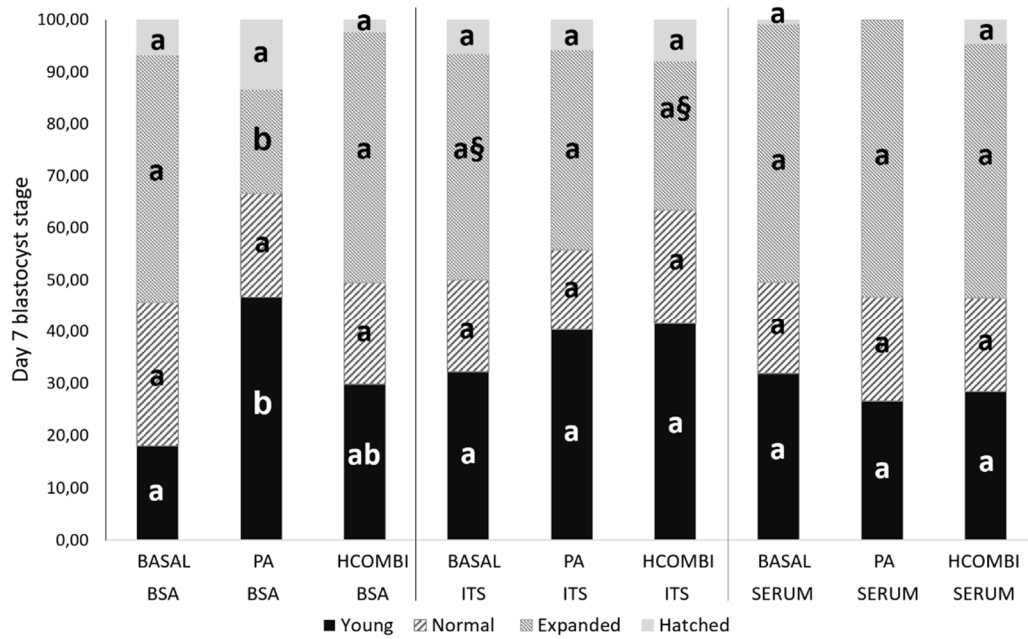

**Figure S1.** Proportions (%) of different stages of blastocysts resulting from oocytes exposed to BASAL, PA and HCOMBI NEFAs during maturation and cultured in the presence of absence of BSA, ITS or serum. Values with different superscripts per embryo stage within the same *in vitro* culture group are significantly different at  $P < 0.05$ . Values labeled with “§” tend to be different from each other at  $P < 0.1$  and  $> 0.05$ .

**Table S2a.** The effect of ITS or serum supplementation during IVC on mRNA expression (fold change) of genes related to cellular stress of blastocysts within the same *in vitro* maturation group (BASAL, PA and HCOMBI). Data are presented as mean fold change  $\pm$  SEM.

| Maturation | Culture | HSP60 fold change              | GPx fold change              | Catalase fold change | ATF4 fold change | TFAM fold change               | HSP10 fold change | SOD2 fold change | ATF4 fold change |
|------------|---------|--------------------------------|------------------------------|----------------------|------------------|--------------------------------|-------------------|------------------|------------------|
| BASAL      | BSA     | 1                              | 1 <sup>a</sup>               | 1                    | 1                | 1                              | 1                 | 1                | 1                |
| BASAL      | ITS     | 1.37 $\pm$ 0.47                | 0.78 $\pm$ 0.16 <sup>b</sup> | 1.26 $\pm$ 0.37      | 1.07 $\pm$ 0.21  | 2.00 $\pm$ 0.64                | 1.95 $\pm$ 0.85   | 1.16 $\pm$ 0.69  | 1.02 $\pm$ 0.20  |
| BASAL      | Serum   | 1.43 $\pm$ 0.40                | 0.42 $\pm$ 0.06 <sup>b</sup> | 1.61 $\pm$ 0.39      | 1.57 $\pm$ 0.64  | 1.63 $\pm$ 0.56                | 1.88 $\pm$ 0.66   | 1.56 $\pm$ 0.78  | 0.80 $\pm$ 0.12  |
| PA         | BSA     | 1.88 $\pm$ 0.35 <sup>xy§</sup> | 0.79 $\pm$ 0.11 <sup>x</sup> | 1.18 $\pm$ 0.17      | 1.15 $\pm$ 0.31  | 0.98 $\pm$ 0.16 <sup>xy§</sup> | 1.44 $\pm$ 0.4    | 1.18 $\pm$ 0.33  | 0.82 $\pm$ 0.24  |
| PA         | ITS     | 1.05 $\pm$ 0.14 <sup>x§</sup>  | 1.03 $\pm$ 0.09 <sup>x</sup> | 0.98 $\pm$ 0.06      | 0.90 $\pm$ 0.15  | 1.40 $\pm$ 0.12 <sup>x§</sup>  | 1.27 $\pm$ 0.10   | 1.09 $\pm$ 0.09  | 0.91 $\pm$ 0.19  |
| PA         | Serum   | 1.50 $\pm$ 0.06 <sup>y</sup>   | 0.31 $\pm$ 0.02 <sup>y</sup> | 0.81 $\pm$ 0.08      | 0.77 $\pm$ 0.08  | 0.99 $\pm$ 0.09 <sup>y</sup>   | 1.03 $\pm$ 0.07   | 0.80 $\pm$ 0.04  | 0.60 $\pm$ 0.08  |
| HCOMBI     | BSA     | 1.06 $\pm$ 0.23                | 1.00 $\pm$ 0.09 <sup>j</sup> | 1.18 $\pm$ 0.34      | 1.32 $\pm$ 0.39  | 1.32 $\pm$ 0.38                | 1.45 $\pm$ 0.35   | 1.46 $\pm$ 0.53  | 1.28 $\pm$ 0.29  |
| HCOMBI     | ITS     | 0.78 $\pm$ 0.10                | 1.03 $\pm$ 0.15 <sup>j</sup> | 0.96 $\pm$ 0.16      | 1.11 $\pm$ 0.28  | 1.29 $\pm$ 0.22                | 1.15 $\pm$ 0.12   | 0.97 $\pm$ 0.14  | 1.02 $\pm$ 0.05  |
| HCOMBI     | Serum   | 1.20 $\pm$ 0.14                | 0.34 $\pm$ 0.09 <sup>k</sup> | 1.32 $\pm$ 0.06      | 2.03 $\pm$ 0.60  | 1.05 $\pm$ 0.11                | 1.61 $\pm$ 0.37   | 0.95 $\pm$ 0.10  | 0.89 $\pm$ 0.14  |

Values with different superscripts within the same *in vitro* maturation group are significantly different at  $P < 0.05$ . Values labeled with a, b are used within BASAL IVM; x, y is used for maturation in the

presence of PA; j, k is used within HCOMBI IVM. Values labeled with “§” or “\$” tend to be different from each other at  $P < 0.1$  and  $> 0.05$ .

**Table S2b.** mRNA expression (fold change) of genes related to cellular stress of blastocysts resulting from BASAL, PA or HCOMBI exposed oocytes cultured in serum, BSA and/or ITS. Data are presented as mean fold change  $\pm$  SEM.

| Matur-<br>ation | Culture | HSP60<br>fold<br>change        | GPx fold<br>change | Catalase<br>fold<br>change     | ATF#6<br>fold<br>change       | TFAM<br>fold<br>change | HSP10<br>fold<br>change | SOD2 fold<br>change | ATF#4<br>fold<br>change |
|-----------------|---------|--------------------------------|--------------------|--------------------------------|-------------------------------|------------------------|-------------------------|---------------------|-------------------------|
| BASAL           | BSA     | 1 <sup>a</sup>                 | 1                  | 1                              | 1                             | 1                      | 1                       | 1                   | 1                       |
| PA              | BSA     | 1.88 $\pm$ 0.35 <sup>b§</sup>  | 0.79 $\pm$ 0.11    | 1.18 $\pm$ 0.17                | 1.15 $\pm$ 0.31               | 0.98 $\pm$ 0.16        | 1.44 $\pm$ 0.41         | 1.18 $\pm$ 0.33     | 0.82 $\pm$ 0.24         |
| HCOMBI          | BSA     | 1.06 $\pm$ 0.23 <sup>ab§</sup> | 1.00 $\pm$ 0.09    | 1.18 $\pm$ 0.34                | 1.32 $\pm$ 0.39               | 1.32 $\pm$ 0.38        | 1.45 $\pm$ 0.35         | 1.46 $\pm$ 0.53     | 1.28 $\pm$ 0.29         |
| BASAL           | ITS     | 1.37 $\pm$ 0.47                | 0.78 $\pm$ 0.16    | 1.26 $\pm$ 0.37                | 1.07 $\pm$ 0.21               | 2.00 $\pm$ 0.64        | 1.95 $\pm$ 0.85         | 1.16 $\pm$ 0.69     | 1.02 $\pm$ 0.20         |
| PA              | ITS     | 1.05 $\pm$ 0.14                | 1.03 $\pm$ 0.09    | 0.98 $\pm$ 0.06                | 0.90 $\pm$ 0.15               | 1.40 $\pm$ 0.12        | 1.27 $\pm$ 0.10         | 1.09 $\pm$ 0.09     | 0.91 $\pm$ 0.19         |
| HCOMBI          | ITS     | 0.78 $\pm$ 0.10                | 1.03 $\pm$ 0.15    | 0.96 $\pm$ 0.16                | 1.11 $\pm$ 0.28               | 1.29 $\pm$ 0.22        | 1.15 $\pm$ 0.12         | 0.97 $\pm$ 0.14     | 1.02 $\pm$ 0.05         |
| BASAL           | Serum   | 1.43 $\pm$ 0.40                | 0.42 $\pm$ 0.06    | 1.61 $\pm$ 0.39 <sup>jk§</sup> | 1.57 $\pm$ 0.64 <sup>jk</sup> | 1.63 $\pm$ 0.56        | 1.88 $\pm$ 0.66         | 1.56 $\pm$ 0.78     | 0.80 $\pm$ 0.12         |
| PA              | Serum   | 1.50 $\pm$ 0.06                | 0.31 $\pm$ 0.02    | 0.81 $\pm$ 0.08 <sup>§</sup>   | 0.77 $\pm$ 0.08 <sup>j</sup>  | 0.99 $\pm$ 0.09        | 1.03 $\pm$ 0.07         | 0.80 $\pm$ 0.04     | 0.60 $\pm$ 0.08         |
| HCOMBI          | Serum   | 1.20 $\pm$ 0.14                | 0.34 $\pm$ 0.09    | 1.32 $\pm$ 0.06 <sup>k</sup>   | 2.03 $\pm$ 0.60 <sup>k</sup>  | 1.05 $\pm$ 0.11        | 1.61 $\pm$ 0.37         | 0.95 $\pm$ 0.10     | 0.89 $\pm$ 0.14         |

Values with different superscripts within the same *in vitro* culture group and column are significantly different at  $P < 0.05$ . Values labeled with a and b are used within BSA IVC; x is used for culture in the presence of ITS; j and k are used within Serum IVC. Values labeled with “§” or “\$” tend to be different from each other at  $P < 0.1$  and  $> 0.05$ .

**Table S3.** The effect of 0.5% ethanol (Solvent) or BASAL NEFA concentrations during IVM on developmental competence:

| Maturation | Culture | Oocytes<br>used | Cleaved<br>embryos | Day 8<br>blastocysts |
|------------|---------|-----------------|--------------------|----------------------|
| Control    | BSA     | 84              | 63<br>(72.9%)      | 25<br>(30.4%)        |
| Solvent    | BSA     | 79              | 51<br>(63.9%)      | 21<br>(26.6%)        |
| BASAL      | BSA     | 84              | 59<br>(71.2%)      | 21<br>(25.1%)        |

% values refer to proportions from total number of the used oocytes. None of the displayed differences were significant ( $P > 0.1$ ).

**Table S4.** Details of primers used for qPCR

| Gene         | Forward primer (5'→3')  | Reverse primer (5'→3') | Product size (bp) | Gene Bank accession number |
|--------------|-------------------------|------------------------|-------------------|----------------------------|
| <i>SOD2</i>  | TGCAAGGAACAACAGGTCTTATC | CTCAGTGTAAGGCTGACGGTT  | 181               | NM_201527.2                |
| <i>GPX1</i>  | AACGTAGCATCGCTCTGAGG    | TCTCCTCGTTCTTGGCGTTT   | 145               | NM_174076.3                |
| <i>CAT</i>   | CTATCCTGACACTCACCGCC    | GAAAGTCCGCACCTGAGTGA   | 268               | NM_001035386.2             |
| <i>HSP10</i> | CAACGGTGGTAGCTGTTGGA    | TGGTGCCTCCATATCTGGG    | 108               | NM_174346.2                |
| <i>HSP60</i> | CTACTGTACTGGCACGCTCT    | CAATCTCTTCGGGGGTTGTC   | 159               | NM_001166608.1             |
| <i>ATF4</i>  | TTTCTGAGCAGCGAGGTGT     | AAGCATCCTCCTTGCTGTTG   | 214               | NM_00134341.2              |
| <i>ATF6</i>  | CGAGGATGGGTTTCATAGGCA   | GACGGCCATGAGCTGAGAAT   | 126               | BC120388.1                 |
| <i>TFAM</i>  | GCCAAGCTATGGAGGGAAT     | AGCTTTACCTGTGATGTGCCA  | 293               | NM_001034016.2             |
| <i>18S</i>   | AGAAACGGCTACCACATCCA    | CACCAGACTTGCCCTCCA     | 169               | AF176811.1                 |
| <i>YWHAZ</i> | GCATCCACAGACTATTTC      | GCAAAGACAATGACAGACCA   | 120               | BM446307.1                 |
| <i>H2A</i>   | CGGAATTCGAAATGGCTGGC    | TCTTTCGATGCATTCCTGCC   | 238               | NM_174809.2                |
| <i>BAX</i>   | AGCAGATCATGAAGACAGGG    | TCAGACACTCGCTCAGCTTC   | 141               | NM_173894.1                |
